# Supplementary material
Source: PubMed Central journal article supplement (PMC7429257)
Supplement: NIHMS1612200-supplement-Supplemenatary_Information.pdf [file NIHMS1612200-supplement-Supplemenatary_Information.pdf]

# **D-Retro Inverso (DRI) Amylin and the Stability of Amylin Fibrils**

Preeti Pandey, Natalie Nguyen, and Ulrich H.E. Hansmann\*

*Department of Chemistry & Biochemistry, University of Oklahoma, Norman, Oklahoma  
73019, United States*

E-mail: [uhansmann@ou.edu](mailto:uhansmann@ou.edu)

# 1 Supplementary Tables

Supplementary Table 1: Twist angle for L-amylin and DRI-amylin.

|       | $\beta 1\text{-Pr1}$ ( $^{\circ}$ ) |                | $\beta 1\text{-Pr2}$ ( $^{\circ}$ ) |                |
|-------|-------------------------------------|----------------|-------------------------------------|----------------|
|       | L-amylin                            | DRI-amylin     | L-amylin                            | DRI-amylin     |
| Run-1 | $-12.8 \pm 2.9$                     | $10.7 \pm 2.5$ | $-5.0 \pm 3.8$                      | $15.5 \pm 2.4$ |
| Run-2 | $-23.7 \pm 5.4$                     | $9.3 \pm 2.7$  | $-16.8 \pm 2.9$                     | $12.5 \pm 3.4$ |
| Run-3 | $-16.1 \pm 2.6$                     | $15.7 \pm 2.8$ | $-15.9 \pm 2.9$                     | $13.1 \pm 2.6$ |
| Avg.  | $-17.5$ (6.0)                       | $11.9$ (3.8)   | $-12.6$ (6.3)                       | $13.7$ (3.1)   |
|       | $\beta 2\text{-Pr1}$ ( $^{\circ}$ ) |                | $\beta 2\text{-Pr2}$ ( $^{\circ}$ ) |                |
|       | L-amylin                            | DRI-amylin     | L-amylin                            | DRI-amylin     |
| Run-1 | $-3.9 \pm 1.9$                      | $7.7 \pm 2.0$  | $-3.2 \pm 1.9$                      | $6.4 \pm 2.2$  |
| Run-2 | $-2.7 \pm 2.1$                      | $4.4 \pm 2.0$  | $-3.2 \pm 2.2$                      | $4.1 \pm 1.9$  |
| Run-3 | $-2.2 \pm 2.4$                      | $9.5 \pm 2.0$  | $-4.5 \pm 3.5$                      | $13.4 \pm 2.5$ |
| Avg.  | $-2.9$ (2.3)                        | $7.2$ (2.9)    | $-3.6$ (2.7)                        | $8.0$ (4.5)    |

Supplementary Table 2: Face to face contact distances of CC–interface double layers of L-amylin and DRI-amylin.

|         | L-amylin                |                         |                         | DRI-amylin              |                         |                         |
|---------|-------------------------|-------------------------|-------------------------|-------------------------|-------------------------|-------------------------|
|         | Pr1-<br>Lr2/Pr2-<br>Lr2 | Pr1-<br>Lr3/Pr2-<br>Lr3 | Pr1-<br>Lr4/Pr2-<br>Lr4 | Pr1-<br>Lr2/Pr2-<br>Lr2 | Pr1-<br>Lr3/Pr2-<br>Lr3 | Pr1-<br>Lr4/Pr2-<br>Lr4 |
| L27–G33 | 7.5 (0.3)               | 7.7 (0.3)               | 7.7 (0.4)               | 8.8 (1.9)               | 8.2 (1.2)               | 8.0 (0.6)               |
| S29–N31 | 6.5 (0.4)               | 6.8 (0.3)               | 7.2 (0.3)               | 8.3 (1.7)               | 7.4 (0.9)               | 7.0 (0.5)               |
| N31–S29 | 6.6 (0.4)               | 6.9 (0.3)               | 7.4 (0.3)               | 8.2 (1.3)               | 7.4 (0.7)               | 6.8 (0.3)               |
| G33–L27 | 7.9 (0.5)               | 8.0 (0.6)               | 8.3 (0.7)               | 8.9 (0.9)               | 8.4 (0.6)               | 8.4 (0.7)               |

Values are shown after excluding the first and the last layers from each of the protofibril.

Supplementary Table 3: Structural changes in L-amylin (L), DRI-amylin (DRI) and Hybrid Amylin models in terms of average root-mean-square deviation ( $\text{\AA}$ ), average Radius of Gyration ( $\text{\AA}$ ) and average solvent-accessible-surface-area ( $\text{\AA}^2$ ).

|      | L     | DRI             | (4L-1D)*2       | (2L-1D-2L)*2    | (L/D)*2         | 5D*5L           | (L/D)*(D/L)     |
|------|-------|-----------------|-----------------|-----------------|-----------------|-----------------|-----------------|
| RMSD | Run-1 | $2.2 \pm 0.1$   | $3.5 \pm 0.2$   | $4.1 \pm 0.2$   | $4.2 \pm 0.3$   | $6.6 \pm 0.3$   | $4.4 \pm 0.2$   |
|      | Run-2 | $4.2 \pm 0.5$   | $3.3 \pm 0.2$   | $3.8 \pm 0.2$   | $6.2 \pm 0.2$   | $4.1 \pm 0.2$   | $4.0 \pm 0.5$   |
|      | Run-3 | $2.6 \pm 0.3$   | $4.2 \pm 0.2$   | $3.1 \pm 0.2$   | $4.7 \pm 0.2$   | $4.7 \pm 0.3$   | $4.4 \pm 0.2$   |
|      | Avg.  | $3.0 (0.9)$     | $3.7 (0.4)$     | $3.7 (0.5)$     | $5.0 (0.9)$     | $5.1 (1.1)$     | $3.8 (1.1)$     |
| Rg   | Run-1 | $22.0 \pm 0.2$  | $22.4 \pm 0.1$  | $23.2 \pm 0.2$  | $22.2 \pm 0.2$  | $22.0 \pm 0.3$  | $22.3 \pm 0.3$  |
|      | Run-2 | $22.8 \pm 0.3$  | $22.0 \pm 0.1$  | $22.4 \pm 0.2$  | $21.8 \pm 0.2$  | $22.4 \pm 0.3$  | $21.6 \pm 0.2$  |
|      | Run-3 | $22.3 \pm 0.2$  | $22.3 \pm 0.2$  | $22.6 \pm 0.1$  | $22.9 \pm 0.2$  | $21.4 \pm 0.4$  | $22.8 \pm 0.1$  |
|      | Avg.  | $22.4 (0.4)$    | $22.2 (0.2)$    | $22.7 (0.4)$    | $22.3 (0.5)$    | $21.9 (0.5)$    | $22.7 (0.2)$    |
| SASA | Run-1 | $16469 \pm 347$ | $18180 \pm 520$ | $18389 \pm 236$ | $17594 \pm 503$ | $20285 \pm 613$ | $19158 \pm 604$ |
|      | Run-2 | $18283 \pm 515$ | $17257 \pm 383$ | $17551 \pm 382$ | $18197 \pm 477$ | $19019 \pm 538$ | $17410 \pm 595$ |
|      | Run-3 | $17413 \pm 407$ | $17724 \pm 437$ | $17132 \pm 410$ | $18110 \pm 404$ | $18213 \pm 797$ | $18544 \pm 590$ |
|      | Avg.  | $17388 (856)$   | $17720 (587)$   | $17691 (629)$   | $17967 (534)$   | $19172 (1077)$  | $17428 (699)$   |

RMSD values are with respect to the start configuration and calculated over the last 80 ns. Only backbone atoms are considered, and the first seven residues of the flexible N-terminus not taken into account.



## 2 Supplementary Figures

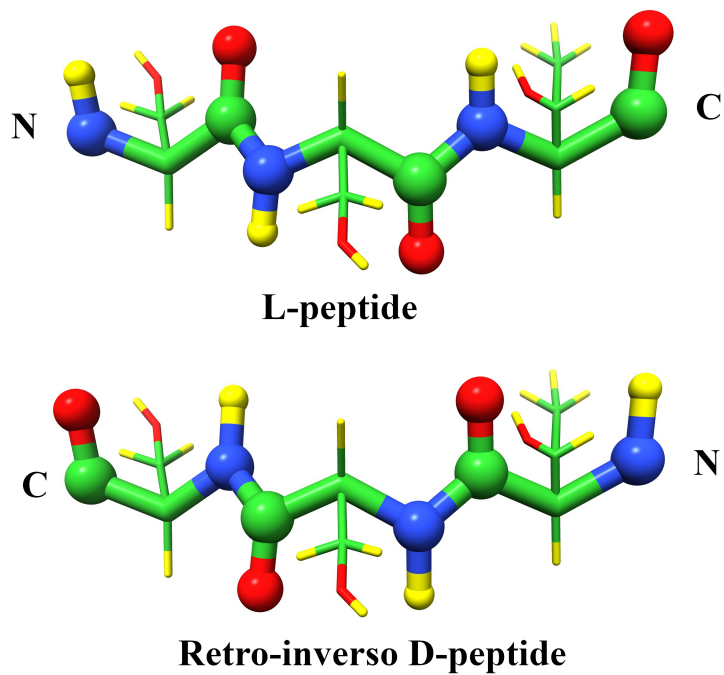

Supplementary Figure 1: Backbone switching to convert L-peptide into its retro-inverso DRI form made of D-amino acids. The backbone atoms are shown as spheres using the color code: N-blue, HN-yellow, C-green and O-red.

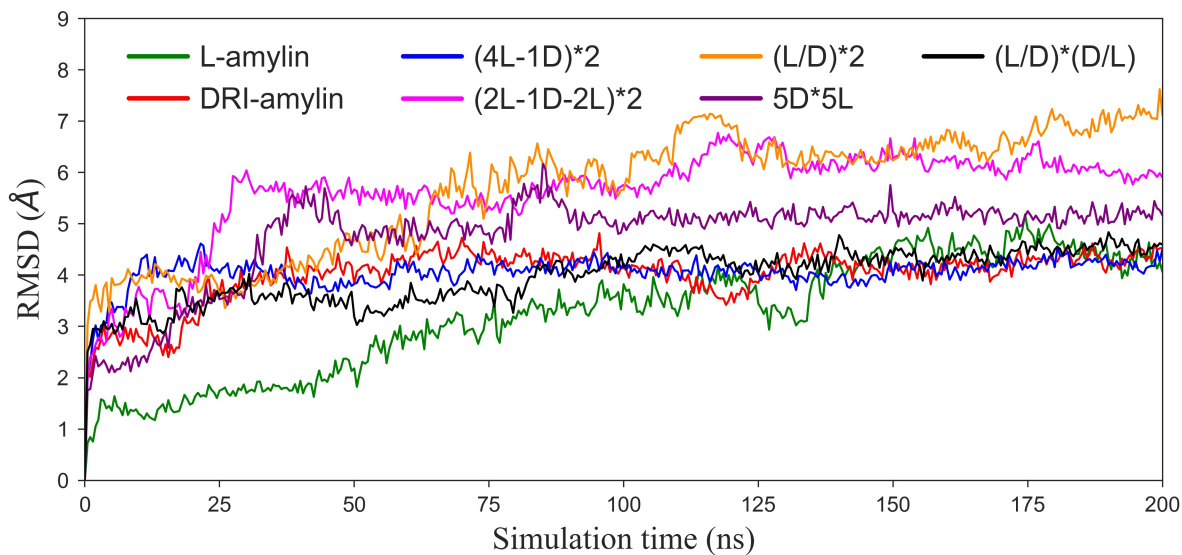

Supplementary Figure 2: Time evolution of root-mean-square deviation (RMSD) of L-amylin, DRI-amylin and L & DRI mixtures. RMSD values are calculated with respect to the starting configuration considering only backbone atoms. Due to higher fluctuation of first 7 residues, they were ignored while calculation of RMSD. Time evolution of RMSD is only shown for the trajectories with the highest fluctuations for the various amylin assemblies.

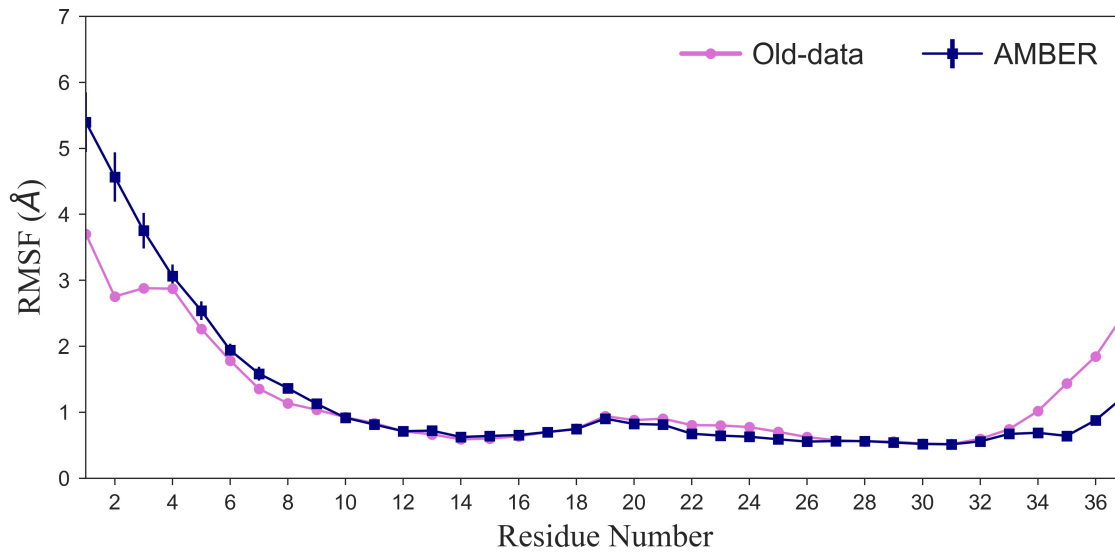

Supplementary Figure 3: Comparison of Root-mean-square fluctuation (RMSF) of the  $C\alpha$  atoms for AMBER force-field with Bernhardt *et. al* (2013). Values are averaged over all monomers and the three trajectories.

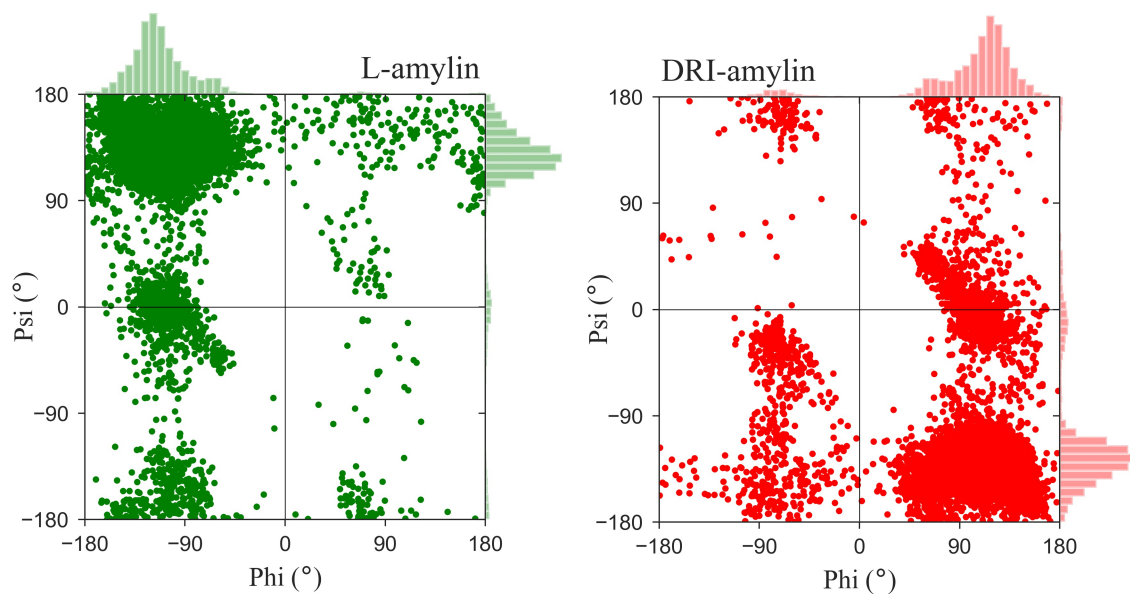

Supplementary Figure 4: Ramachandran plot for L-amylin and DRI-amylin.

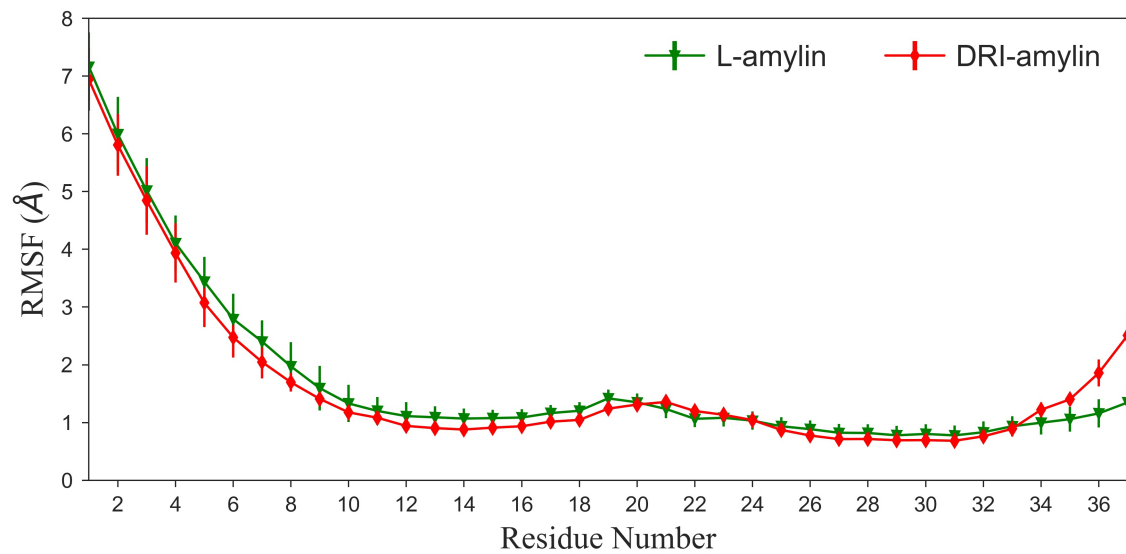

Supplementary Figure 5: Root-mean-square fluctuation (RMSF) of the  $C\alpha$  atoms for L-amylin and DRI-amylin. Values are averaged over all monomers and the three trajectories.

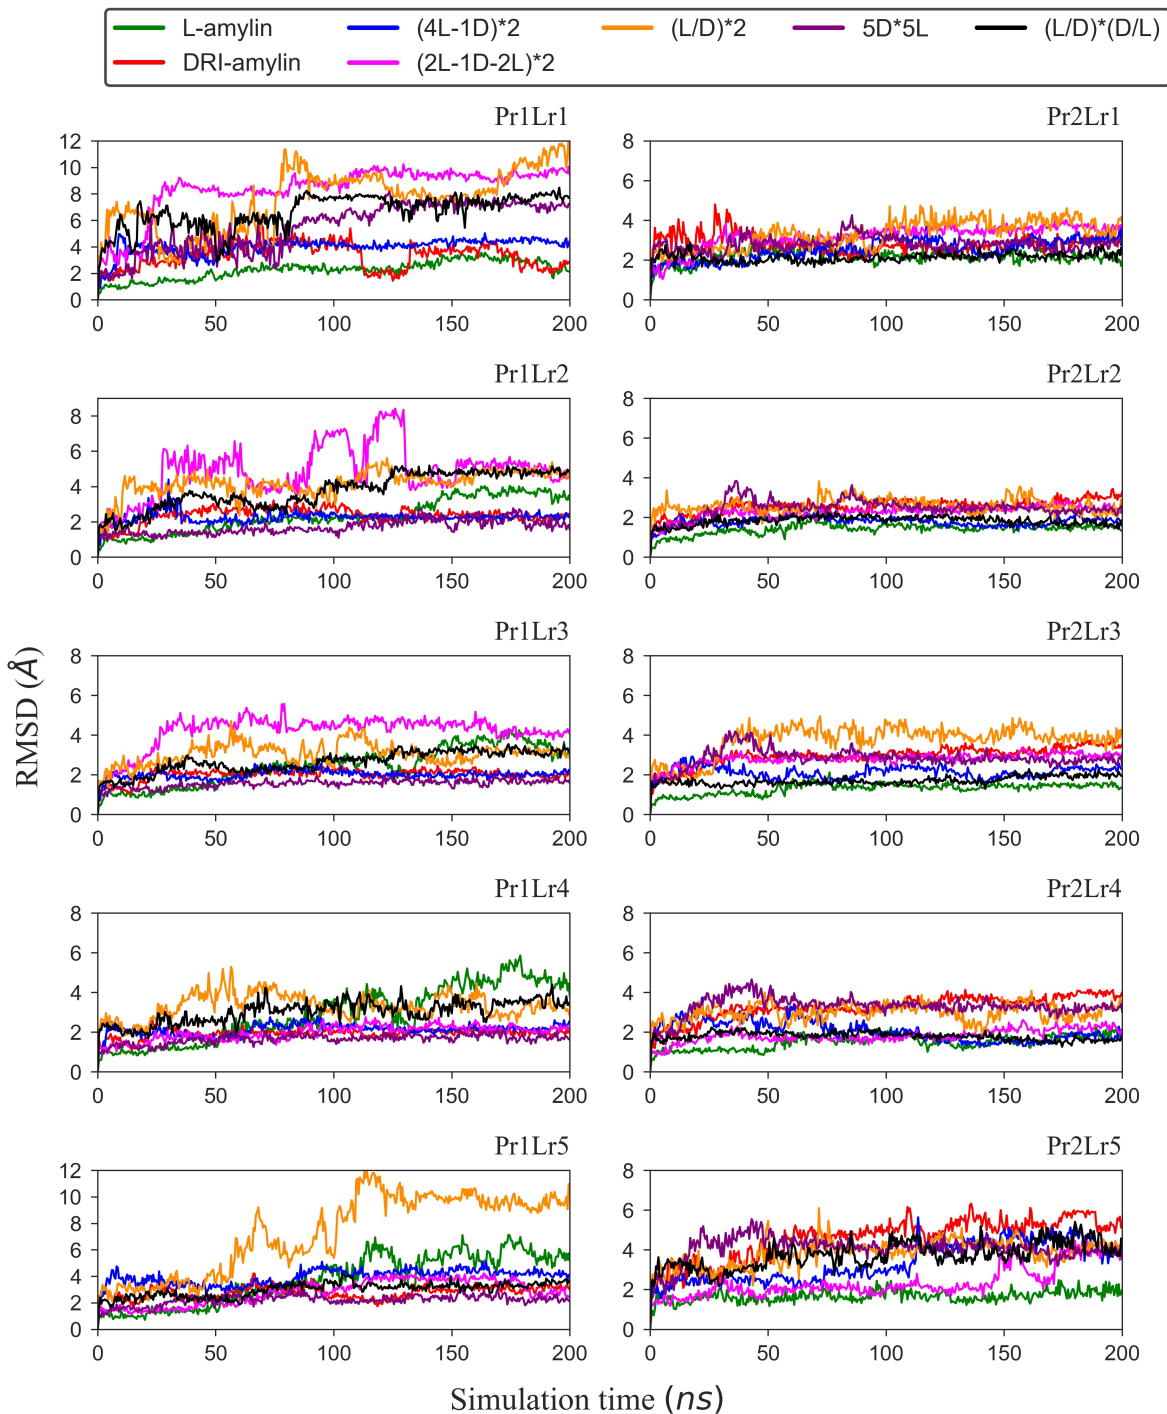

Supplementary Figure 6: Time evolution of root-mean-square deviation (RMSD) of individual monomers of L-amylin, DRI-amylin and L & DRI mixtures. RMSD values are calculated with respect to the starting configuration considering only backbone atoms. Due to higher fluctuation of first 7 residues, they were ignored while calculation of RMSD. Time evolution of RMSD is only shown for the trajectories with the highest fluctuations for the various amylin assemblies.

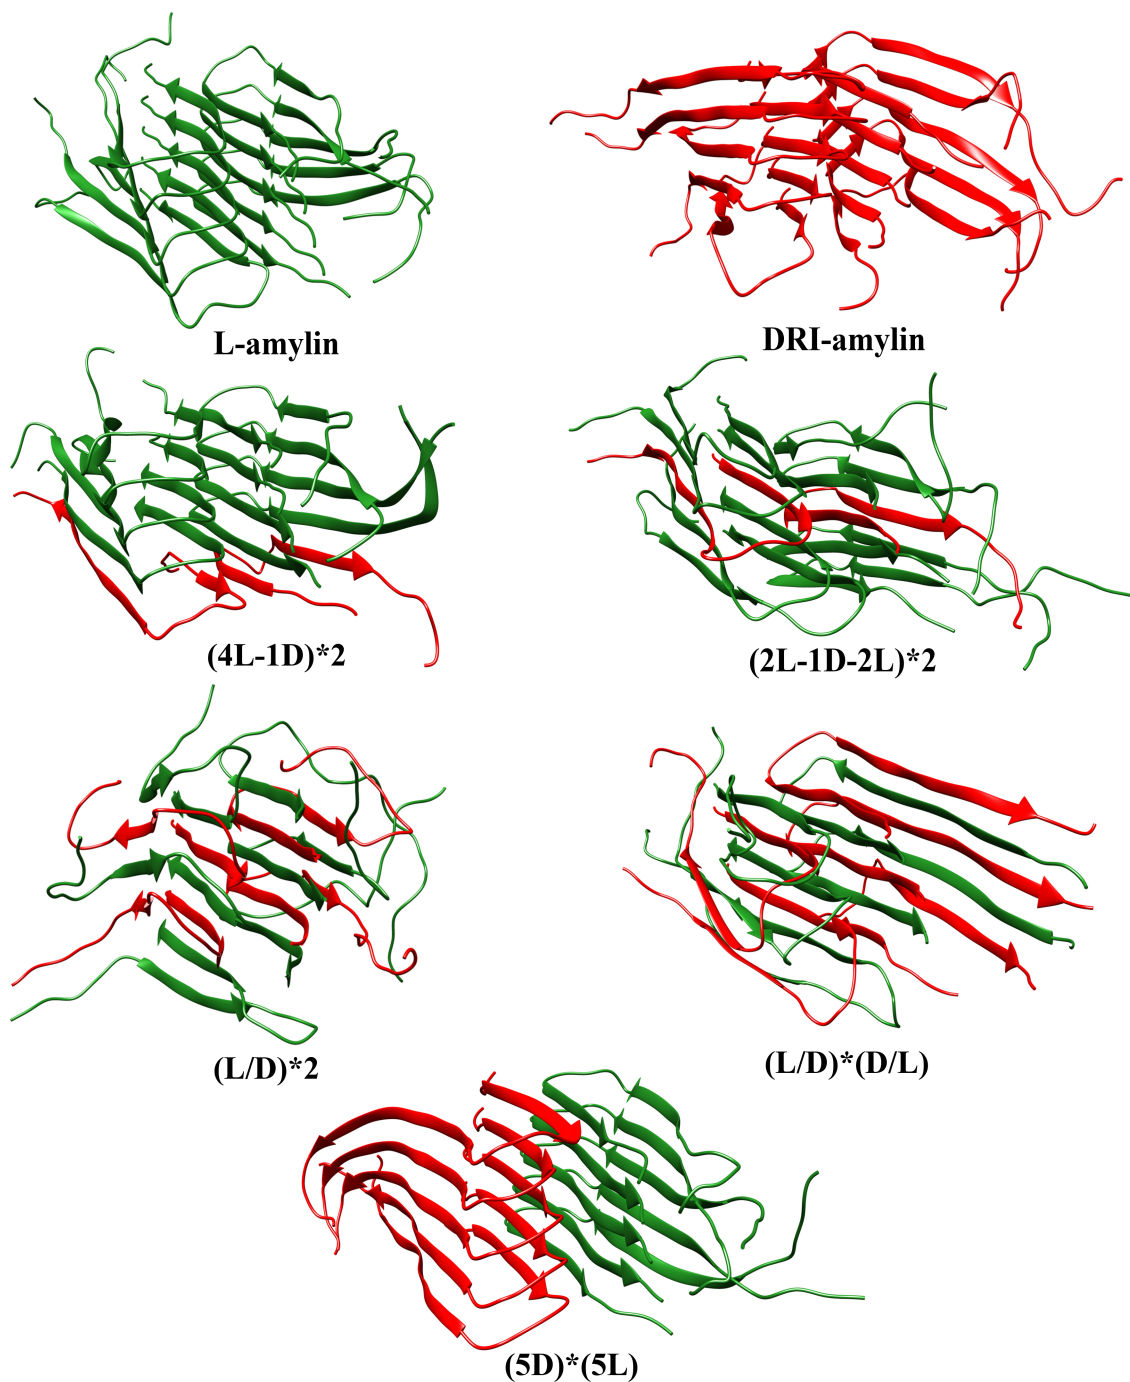

Supplementary Figure 7: Representative conformations of L-amylin, DRI-amylin and L & DRI mixtures after 200 *ns* simulation.
